# Supplementary material for: De novo macrocyclic peptides dissect energy coupling of a heterodimeric ABC transporter by multimode allosteric inhibition
Source: eLife journal article supplement (doi:10.7554/elife.67732), 2021-04-30
Supplement: supp [file elife-67732-supp-v1.zip]

Archive with 15 entries (15 files):
- elife_poa_e67732_Figure_1_figure_supplement_1.ai
- elife_poa_e67732_Figure_2_figure_supplement_1.ai
- elife_poa_e67732_Figure_2_figure_supplement_2.ai
- elife_poa_e67732_Figure_5_figure_supplement_1.ai
- elife_poa_e67732_Figure_6_figure_supplement_1.ai
- elife_poa_e67732_Figure_1_source_data_1.zip
- elife_poa_e67732_Figure_2_source_data_1.docx
- elife_poa_e67732_Figure_2_figure_supplement_1_source_data_1.docx
- elife_poa_e67732_Figure_3_source_data_1.docx
- elife_poa_e67732_Figure_4_source_data_1.docx
- elife_poa_e67732_Figure_5_source_data_1.docx
- elife_poa_e67732_Figure_5_figure_supplement_1_source_data_1.docx
- elife_poa_e67732_Figure_6_source_data_1.docx
- elife_poa_e67732_Figure_6_figure_supplement_1_source_data_1.docx
- elife_poa_e67732_Transparent_Reporting_File.pdf
