# Supplementary material for: De novo macrocyclic peptides dissect energy coupling of a heterodimeric ABC transporter by multimode allosteric inhibition
Source: eLife journal article supplement (doi:10.7554/elife.67732), 2021-04-30
Supplement: supp [file elife-67732-supp-v1.zip › elife_poa_e67732_Figure_6_figure_supplement_1_source_data_1.docx]

| Figure 6 | supplemental figure 1 | | c |  |  |
| --- | --- | --- | --- | --- | --- |
|  |  |  |  |  |  |
|  |  |  | Mean fluorescence intensity | | |
| Peptides/liposome | |  | Mean | SD |  |
|  |  |  |  |  |  |
| 1.24 |  |  | 104.37 | 38.60 |  |
| 4.96 |  |  | 358.70 | 41.02 |  |
| 10.78 |  |  | 701.70 | 38.48 |  |
| 42.16 |  |  | 3204.37 | 38.72 |  |
| 88.50 |  |  | 5937.37 | 43.81 |  |
